# Supplementary material
Source: PubMed Central journal article supplement (PMC3023305)
Supplement: NIHMS248984-supplement-01.pdf [file NIHMS248984-supplement-01.pdf]

**Table S1. Viral titers<sup>§</sup> in the blood post-vaccination with ACAM2000 and treatment with vehicle or ST-246.**

| Vaccinated Groups                         | ST-246 Treatment | Assay Day | % of mice with detectable levels of viral DNA <sup>¶</sup> | Genome copies ( $\times 10^3$ /ml) <sup>‡</sup> |        |        |        |        | P-value <sup>a</sup> |
|-------------------------------------------|------------------|-----------|------------------------------------------------------------|-------------------------------------------------|--------|--------|--------|--------|----------------------|
|                                           |                  |           |                                                            | M1                                              | M2     | M3     | M4     | M5     |                      |
| <b>Experiment #1<sup>¶¶</sup></b>         |                  |           |                                                            |                                                 |        |        |        |        |                      |
| N.D./BALB/c                               | -                | 7         | 80%                                                        | 3.91                                            | 4.05   | 5.15   | 7.38   | < LLOQ | <b>0.561</b>         |
|                                           | +                | 7         | 40%                                                        | 4.59                                            | 5.58   | < LLOQ | < LLOQ | < LLOQ |                      |
| CD8 <sup>-</sup> /BALB/c                  | -                | 7         | 75%                                                        | 6.54                                            | 32.70  | 32.90  | < LLOQ | N/A    | <b>0.066</b>         |
|                                           | +                | 7         | 40%                                                        | 4.09                                            | 8.38   | < LLOQ | < LLOQ | < LLOQ |                      |
| CD4 <sup>-</sup> /BALB/c                  | -                | 7         | 75%                                                        | 3.74                                            | 15.60  | 17.20  | < LLOQ | N/A    | <b>0.013</b>         |
|                                           | +                | 7         | 40%                                                        | 3.89                                            | 5.52   | < LLOQ | < LLOQ | < LLOQ |                      |
| N.D./JH-KO                                | -                | 7         | 80%                                                        | 10.80                                           | 30.80  | 44.20  | 51.60  | < LLOQ | <b>0.118</b>         |
|                                           | +                | 7         | 40%                                                        | 12.30                                           | 16.60  | < LLOQ | < LLOQ | < LLOQ |                      |
| <b>Experiment #2<sup>¶¶</sup></b>         |                  |           |                                                            |                                                 |        |        |        |        |                      |
| CD8 <sup>-</sup> CD4 <sup>-</sup> /BALB/c | -                | 7         | 60%                                                        | 4.08                                            | 7.37   | 10.10  | < LLOQ | < LLOQ | <b>0.169</b>         |
|                                           | +                | 7         | 10%                                                        | 7.03                                            | < LLOQ | < LLOQ | < LLOQ | < LLOQ |                      |
| N.D./JH-KO                                | -                | 7         | 80%                                                        | 4.06                                            | 6.68   | 7.33   | 7.70   | < LLOQ | <b>0.003</b>         |
|                                           | +                | 7         | 0%                                                         | < LLOQ                                          | < LLOQ | < LLOQ | < LLOQ | < LLOQ |                      |
| CD8 <sup>-</sup> /JH-KO                   | -                | 7         | 60%                                                        | 3.61                                            | 3.63   | 12.60  | < LLOQ | < LLOQ | <b>0.099</b>         |
|                                           | +                | 7         | 20%                                                        | 5.09                                            | < LLOQ | < LLOQ | < LLOQ | < LLOQ |                      |
| CD4 <sup>-</sup> /JH-KO                   | -                | 7         | 20%                                                        | 4.45                                            | < LLOQ | < LLOQ | < LLOQ | < LLOQ | <b>0.594</b>         |
|                                           | +                | 7         | 0%                                                         | < LLOQ                                          | < LLOQ | < LLOQ | < LLOQ | < LLOQ |                      |
| CD8 <sup>-</sup> CD4 <sup>-</sup> /JH-KO* | -                | 7         | 100%                                                       | 5.03                                            | 11.60  | 21.50  | 29.90  | 80.90  | <b>0.007</b>         |
|                                           | +                | 7         | 20%                                                        | 6.74                                            | < LLOQ | < LLOQ | < LLOQ | < LLOQ |                      |
|                                           | -                | 14        | 80%                                                        | 5.88                                            | 17.90  | 28.40  | 121.00 | < LLOQ |                      |
|                                           | +                | 14        | 40%                                                        | 4.76                                            | 5.94   | < LLOQ | < LLOQ | < LLOQ |                      |
|                                           | -                | 21        | 40%                                                        | 4.42                                            | 5.42   | < LLOQ | < LLOQ | < LLOQ |                      |
|                                           | +                | 21        | 20%                                                        | 7.13                                            | < LLOQ | < LLOQ | < LLOQ | < LLOQ |                      |

<sup>§</sup> Measured on days 3, 7, 14, 21, and 28 p.v. in whole blood using quantitative real-time polymerase chain reaction (qRT-PCR) as described previously [17].

<sup>¶</sup> Percentage of mice with VV genome copy numbers above the Lower Limit of Quantification (LLOQ) =  $3.5 \times 10^{-3}$  genome copies/ml.

<sup>‡</sup> Numbers shown for each mouse (M) in the group (n = 4 or 5) if above the LLOQ; N/A: Not available since n = 4.

<sup>a</sup> Vaccine/vehicle vs. vaccine/ST-246 comparison using Student's *t*-test on log-transformed data. Extrapolated values were used for those below the LLOQ.

*P*-value <0.050 is considered statistically significant.

<sup>¶¶</sup> The two experiments were performed at different times but were set up in a similar manner.

\* Only day 7 data is shown for all of the above groups since all values were below LLOQ on days 3, 14, 21, and 28 p.v.
