# Supplementary material
Source: PubMed Central journal article supplement (PMC3023305)
Supplement: NIHMS248984-supplement-02.pdf [file NIHMS248984-supplement-02.pdf]

**Table S2. Comet inhibition assay scores<sup>§</sup>**

| Vaccinated Groups                             | 1 month post-vaccination |                | 6 months post-vaccination |                |
|-----------------------------------------------|--------------------------|----------------|---------------------------|----------------|
|                                               | Vaccine/Vehicle          | Vaccine/ST-246 | Vaccine/Vehicle           | Vaccine/ST-246 |
| N.D._BALB/c (A)                               | ++                       | ++             | (B) +++++                 | +++++          |
| CD8 <sup>-</sup> _BALB/c (C)                  | ++                       | ++             | (D) +++                   | +++            |
| CD4 <sup>-</sup> _BALB/c (E)                  | -                        | -              | (F) +                     | +              |
| CD8 <sup>-</sup> CD4 <sup>-</sup> _BALB/c (G) | -                        | -              | (H) +++                   | +++            |
| All JH-KO Groups <sup>‡</sup> (I)             | -                        | -              | (I) -                     | -              |
| <u>Controls</u>                               |                          |                |                           |                |
| Naïve_BALB/c (K)                              | -                        |                |                           |                |
| Naïve_JH-KO (L)                               | -                        |                |                           |                |
| No Plasma (M)                                 | -                        |                |                           |                |
| Methylcellulose (N)                           | ++++                     |                |                           |                |

<sup>§</sup> For data shown in Figure 3.

<sup>‡</sup> Includes N.D./JH-KO, CD8<sup>-</sup>/JH-KO, CD4<sup>-</sup>/JH-KO, and CD8<sup>-</sup>CD4<sup>-</sup>/JH-KO mice.

- No comet tail inhibition

+ to +++++ Low to high levels of comet tail inhibition
